# Supplementary material for: The Performance of Three Immune Assays to Assess the Serological Status of Cattle Experimentally Exposed to Mycoplasma bovis
Source: MDPI journal article supplement (doi:10.3390/vetsci5010027), 2018-03-08
Supplement: s1 [file s1]

**Table S1.** Monoclonal antibodies used in this study and the *Mycoplasma bovis* variable surface proteins (Vsp) recognised. The reported molecular sizes of each Vsp are shown in parenthesis.

| Monoclonal Antibody | Specificity                                              | Reference                                     |
|---------------------|----------------------------------------------------------|-----------------------------------------------|
| 1E5                 | VspA (63–67 kDa),<br>VspB (35–46 kDa), and VspC (75 kDa) | Behrens et al. [6] and Lysnyansky et al. [29] |
| 2A8                 | VspC<br>VspO (40 kDa)                                    | Beier et al. [7]                              |
| 9F1                 | VspF (55 kDa)                                            | Lysnyansky et al. [30]                        |
| 4D7                 | VspA, VspB and VspC <sup>1</sup>                         | Beier et al. [7]                              |
| 6E5                 | VspA                                                     | Beier et al. [7]                              |

<sup>1</sup> Distinct epitope from 1E5

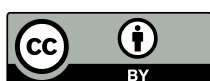

© 2018 by the authors. Submitted for possible open access publication under the terms and conditions of the Creative Commons Attribution (CC BY) license (<http://creativecommons.org/licenses/by/4.0/>).
