# Supplementary material for: The Performance of Three Immune Assays to Assess the Serological Status of Cattle Experimentally Exposed to Mycoplasma bovis
Source: MDPI journal article supplement (doi:10.3390/vetsci5010027), 2018-03-08
Supplement: s1 [file s1]

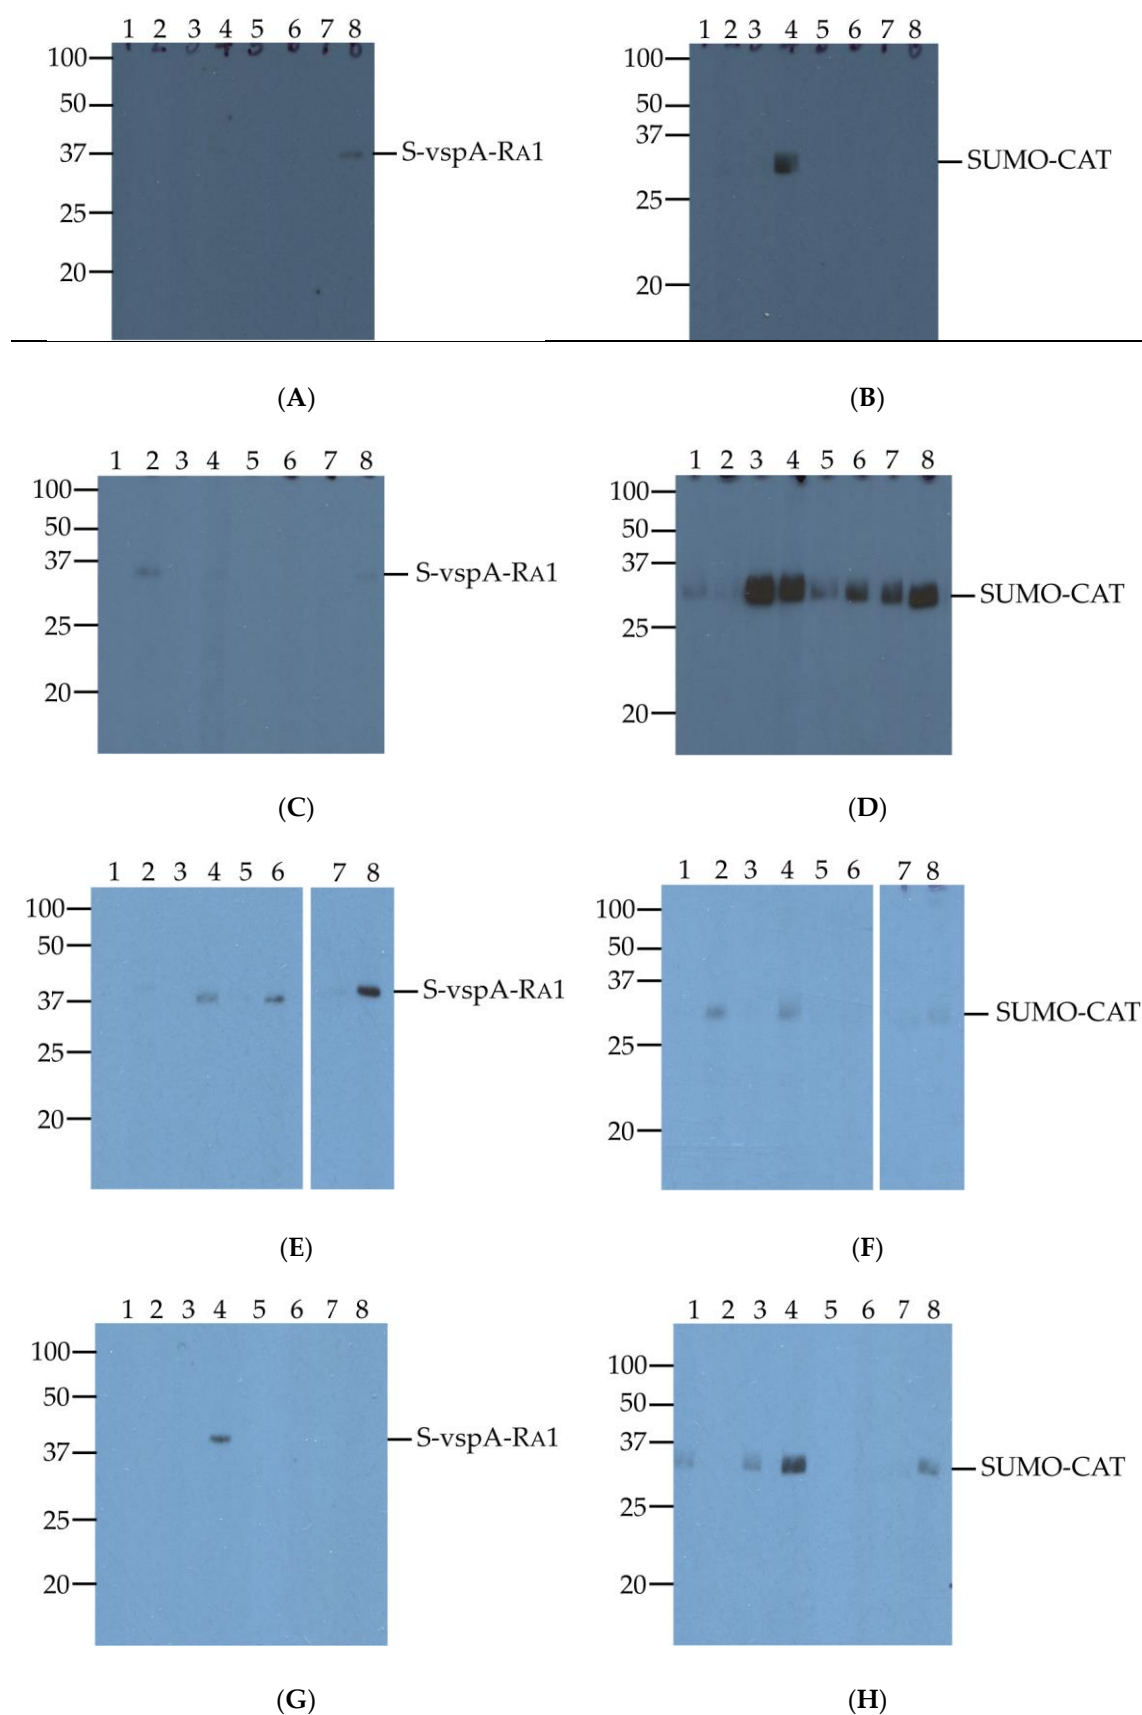

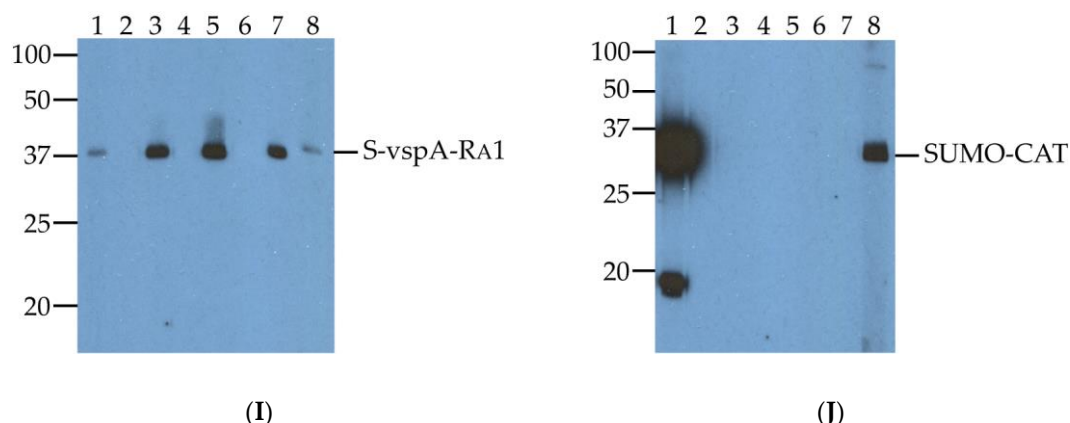

**Figure S1.** Western blot analyses of selected Australian paired sera (n = 16) and ELISA control samples using the S-vspA-RA1 and SUMO-CAT polypeptides. Animal numbers are shown with postscripts indicated the day of serum collection, Day 0 (D0) and Day 24 (D24). The 100 kDa, 50 kDa, 37 kDa, 25 kDa and 20 kDa molecular markers (kDa) are shown. (A) Reactivity to S-vspA-RA1 and (B) Reactivity to SUMO-CAT: Lane 1 APCA3\_D0; Lane 2 APCA3\_D24; Lane 3 APCA5\_D0; Lane 4 APCA5\_D24; Lane 5 APCA7\_D0; Lane 6 APCA7\_D24; Lane 7 APCA8\_D0; Lane 8 APCA8\_D24. (C) Reactivity to S-vspA-RA1 and (D) Reactivity to SUMO-CAT: Lane 1 APCA9\_D0; Lane 2 APCA9\_D24; Lane 3 APCA10\_D0; Lane 4 APCA10\_D24; Lane 5 APCA13\_D0; Lane 6 APCA13\_D24; Lane 7 APCA18\_D0; Lane 8 APCA18\_D24. (E) Reactivity to S-vspA-RA1 and (F) Reactivity to SUMO-CAT: Lane 1 APCA20\_D0; Lane 2 APCA20\_D24; Lane 3 APCA21\_D0; Lane 4 APCA21\_D24; Lane 5 APCA22\_D0; Lane 6 APCA22\_D24; Lane 7 APCA23\_D0; Lane 8 APCA23\_D24. (G) Reactivity to S-vspA-RA1 and (H) Reactivity to SUMO-CAT: Lane 1 APCA24\_D0; Lane 2 APCA24\_D24; Lane 3 APCA26\_D0; Lane 4 APCA26\_D24; Lane 5 APCA30\_D0; Lane 6 APCA30\_D24; Lane 7 APCA31\_D0; Lane 8 APCA31\_D24. (I) Reactivity to S-vspA-RA1 and (J) Reactivity to SUMO-CAT of selected control antibodies: Lane 1 Hexa-histidine monoclonal antibody; Lane 2 SMYC09128 Negative; Lane 3 SMYC09128 Positive; Lane 4 MYC13K26 Negative; Lane 5 MYC13K26 Positive; Lane 6 SMYC13K26 Negative; Lane 7 SMYC13K26 Positive; Lane 8 IBRPM12F04 Positive.

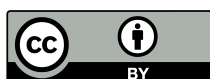

© 2018 by the authors. Submitted for possible open access publication under the terms and conditions of the Creative Commons Attribution (CC BY) license (<http://creativecommons.org/licenses/by/4.0/>).
